# Supplementary material for: Fabrication of Humidity-Resistant Optical Fiber Sensor for Ammonia Sensing Using Diazo Resin-Photocrosslinked Films with a Porphyrin-Polystyrene Binary Mixture
Source: MDPI journal article supplement (doi:10.3390/s21186176), 2021-09-15
Supplement: s1 [file s1]

## Supporting information

# Fabrication of Humidity-Resistant Optical Fiber Sensors for Ammonia Sensing Using Diazo Resin-Photocrosslinked Films with a Porphyrin-Polystyrene Binary Mixture

Soad Ahmed <sup>a</sup>, Yeawon Park <sup>a</sup>, Hirofumi Okuda <sup>a</sup>, Shoichiro Ono <sup>a</sup>, Sergiy Korposh <sup>b</sup>, and  
Seung-Woo Lee <sup>a,\*</sup>

<sup>a</sup> Graduate School of Environmental Engineering, The University of Kitakyushu, 1-1 Hibikino, Kitakyushu 808-0135, Japan.

<sup>b</sup> Department of Electrical and Electronic Engineering, University of Nottingham, Nottingham, NG7 2RD, UK.

\*Correspondence: leesw@kitakyu-u.ac.jp (S.-W. L.); Tel.: +81-93-695-3293.

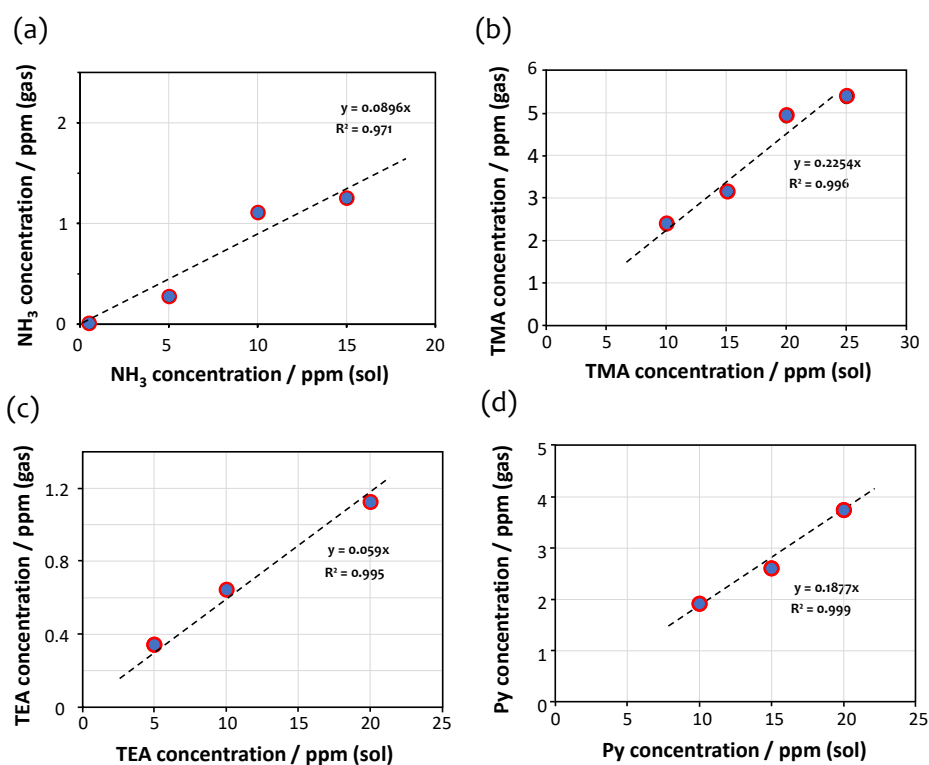

**Figure S1.** Calibration curves between the actual amine gas concentrations and the corresponding amine concentrations in the solutions: (a) ammonia, (b) TMA, (c) TEA, and (d) Py.

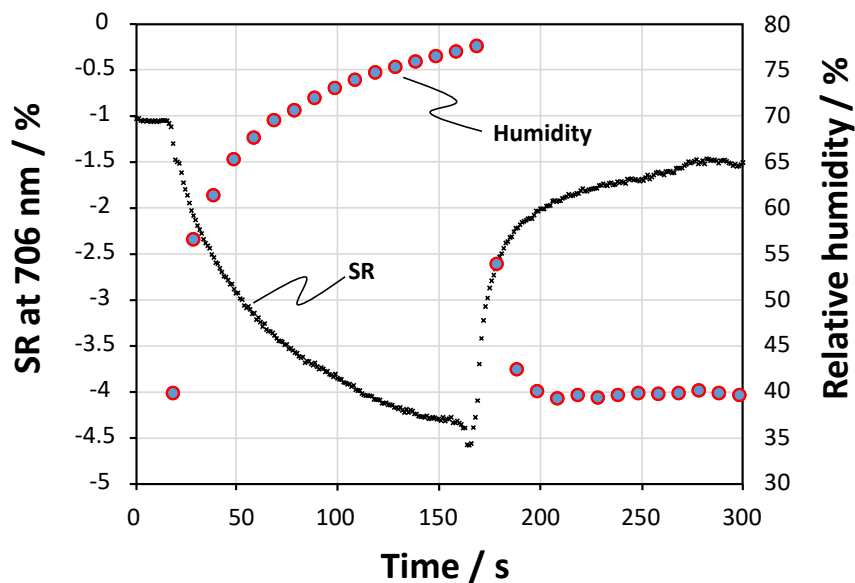

**Figure S2.** Relative humidity changes inside the measurement chamber during the sample measurement. When the SR, e.g., to 10 ppm (sol) of ammonia, almost saturated, the relative humidity reached approximately 80% at room temperature (approximately 24 °C).

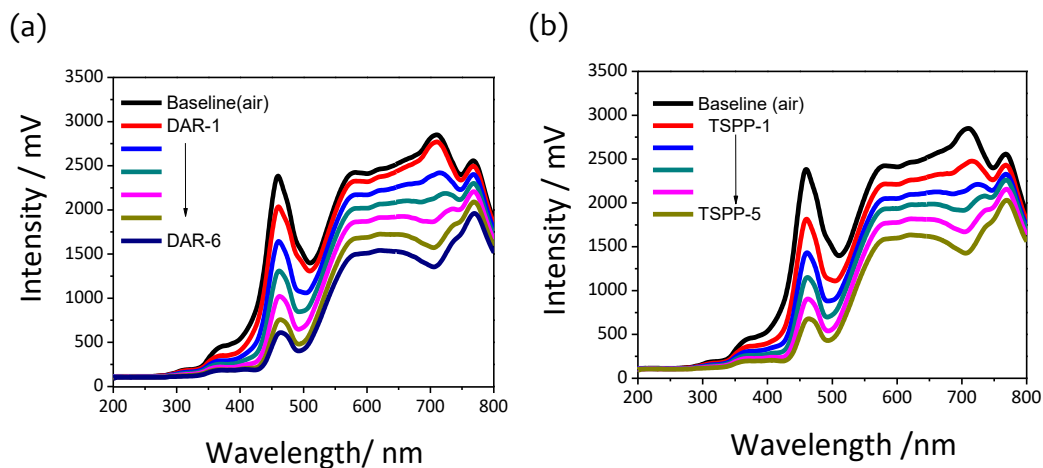

**Figure S3.** Evolution of the transmission spectra of the DAR/TSPP+PSS (0.025 wt%) alternate layers deposited onto the 1-cm-long stripped core of a U-bent optical fiber when the outermost layer was deposited with (a) DAR and (b) TSPP+PSS, respectively.

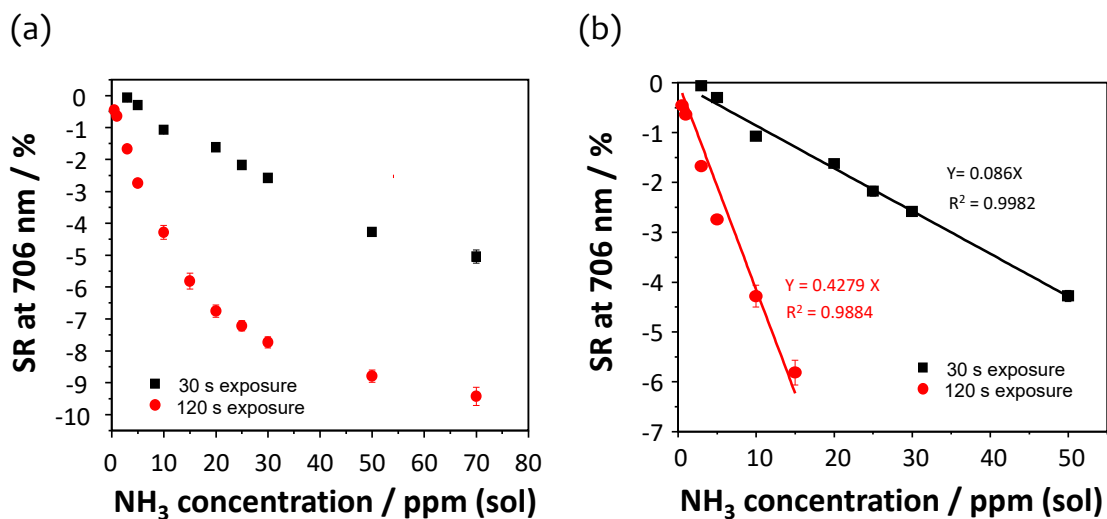

**Figure S4.** Comparison of the (a) SRs and (b) calibration curves of the OFS coated with a DAR/TSPP+PSS (0.025%) film when exposed to ammonia gas for 30 s and 120 s. The linear trend of the sensor response–concentration curve was extended up to 50 ppm (sol) of ammonia when the exposure time (30 s) was shortened.

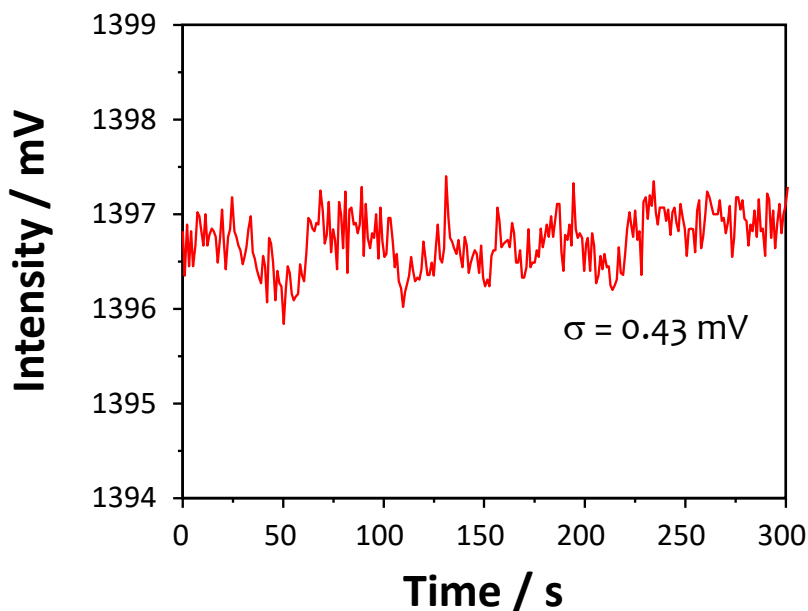

**Figure S5.** A baseline of the DAR/TSPP+PSS (0.025 wt%) film in a steady state before exposure to ammonia, showing a possible noise value of 0.43 mV ( $\sigma$ ), which was used to determine the limit of detection (LOD) of the U-bent fiber sensors for ammonia.

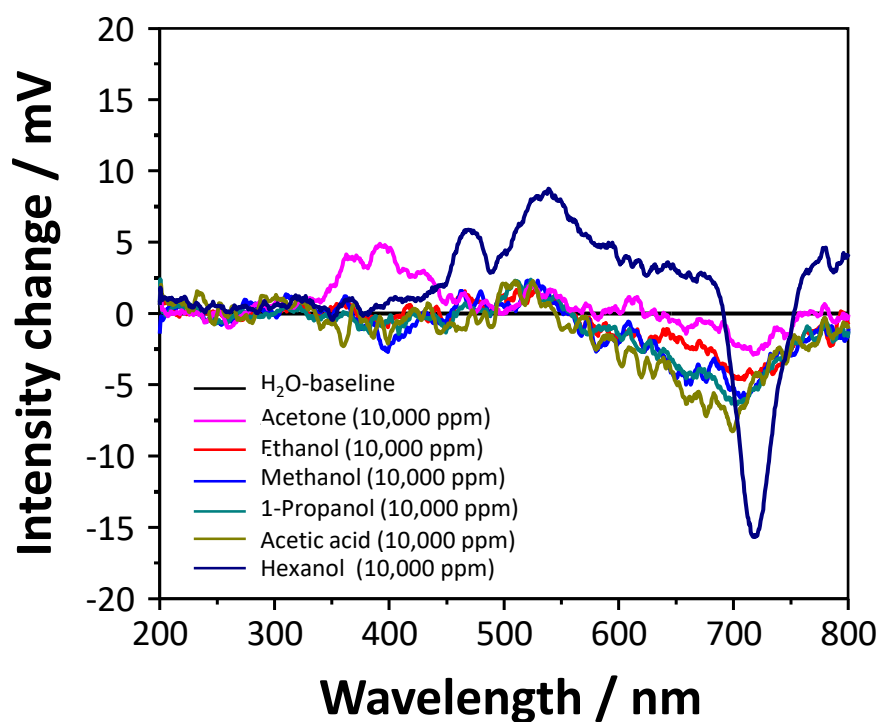

**Figure S6.** Intensity changes in the transmission spectra due to the exposure of the U-bent OFS coated with a DAR/TSPP+PSS (0.025%) to different non-amine analytes.

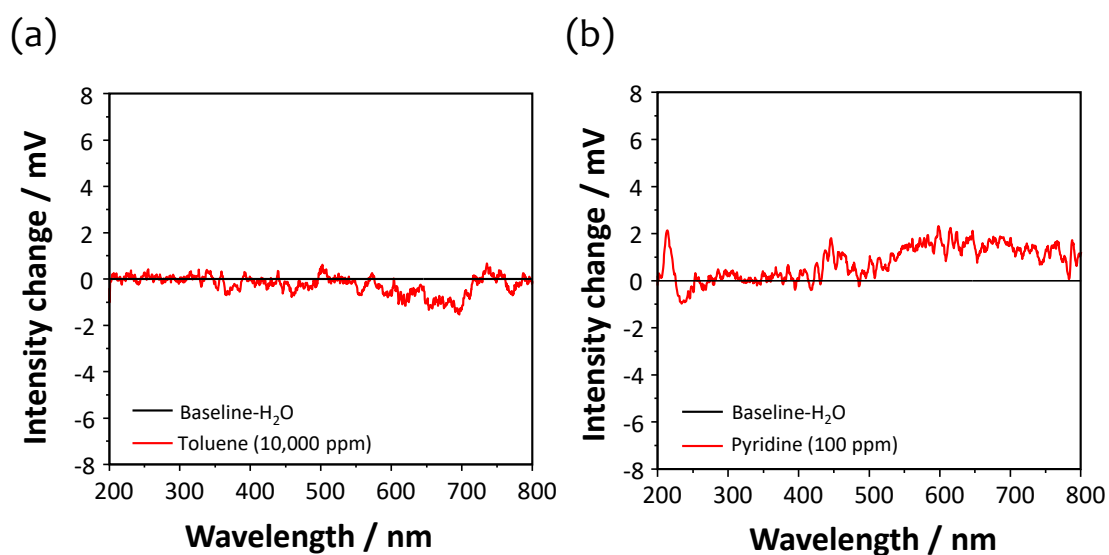

**Figure S7.** Intensity changes in the transmission spectra due to the exposure of the U-bent OFS coated with a DAR/TSPP+PSS (0.025%) to (a) toluene (10,000 ppm) and (b) Py (100 ppm).

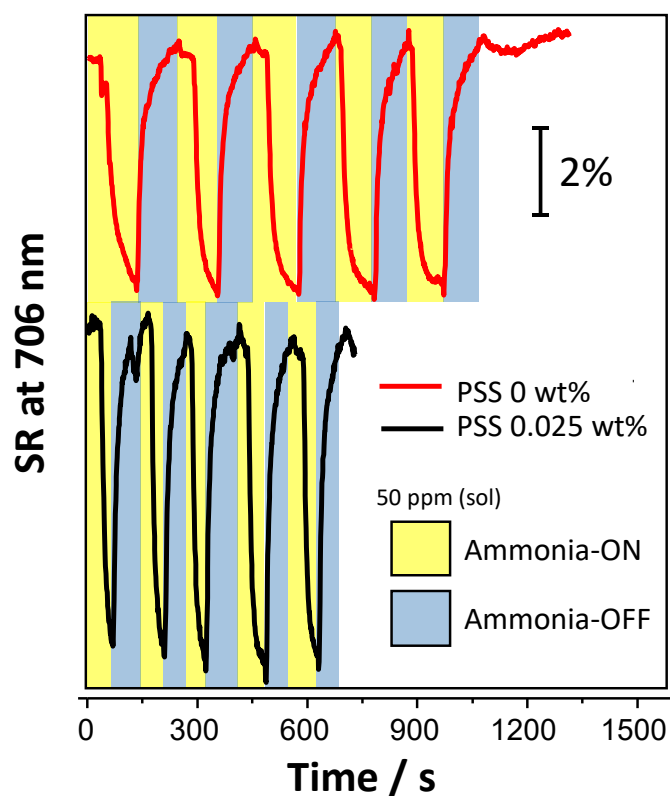

**Figure S8.** Comparison of dynamic SRs at 706 nm upon repeated exposure to 50 ppm (sol) of ammonia for the 5-cycle DAR/TSPP+PSS (0 and 0.025 wt%) films.

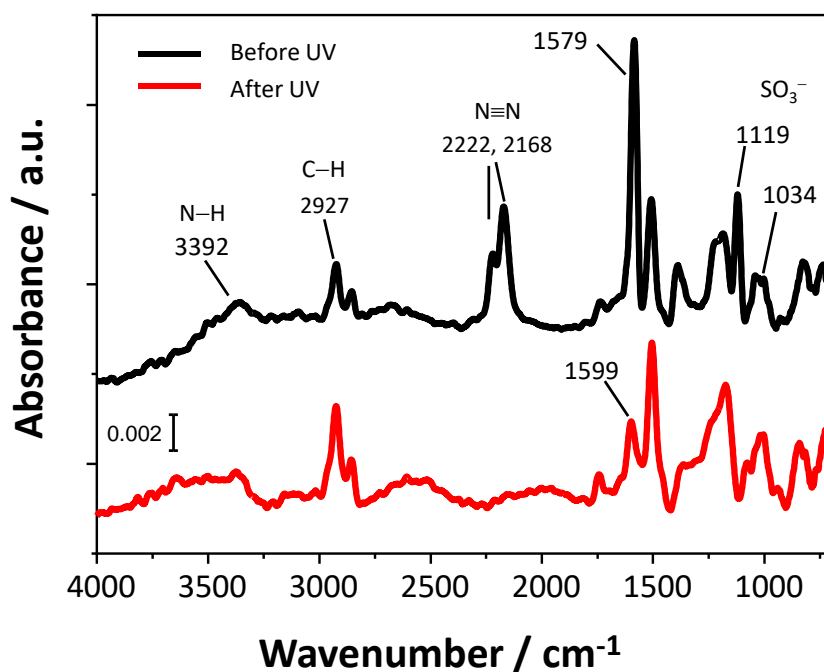

**Figure S9.** FT-IR spectra of a 10-cycle DAR/TSPP+PSS (0.025 wt%) film deposited on a gold-coated silicon wafer substrate before and after UV irradiation.

The formation of covalent linkages following the decomposition of the diazonium group was further verified by FT-IR measurements (Figure S9). A 10-cycle DAR/TSPP+PSS (0.025 wt%) film deposited on a gold-coated silicon wafer substrate was monitored before and after UV irradiation. The two absorption peaks observed before UV irradiation at 2168 and 2222  $\text{cm}^{-1}$  originate from the symmetric and asymmetric stretching vibrational modes of the diazonium ion ( $\text{N}_2^+$ ), respectively [1]. After UV irradiation, these two peaks disappeared completely, indicating the decomposition of the diazonium groups. The bands between 1500 and 1579  $\text{cm}^{-1}$  are attributed to the aromatic rings among, and the strong peak at 1579  $\text{cm}^{-1}$  indicates the presence of phenyl groups in the diazonium moiety of DAR. This characteristic peak decreased notably, with a subsequent peak shift to 1599  $\text{cm}^{-1}$  after UV irradiation. The characteristic bands of sulfonate groups are usually observed in the range of wavenumbers from 800–1350  $\text{cm}^{-1}$ . Thus, the two absorption peaks at 1034 and 1119  $\text{cm}^{-1}$  can be attributed to the stretching vibrations of the aromatic sulfonate groups ( $\text{SO}_3^-$ ). On the other hand, the peak at 1119  $\text{cm}^{-1}$  completely disappeared, while the asymmetric stretching vibration of the sulfonate group at 1034  $\text{cm}^{-1}$  became more apparent after UV irradiation. These results suggest that the successful decomposition of the diazonium group was achieved through the formation of a covalent bond between the DAR and the mixture of TSPP and PSS.

- [1] Sun, J.; Wu, T.; Liu, F.; Wang, Z.; Zhang, X.; Shen, J. Covalently attached multilayer assemblies by sequential adsorption of polycationic diazo-resins and polyanionic poly(acrylic acid). *Langmuir* **2000**, *16*, 4620–4624, doi.org/10.1021/la991482z.
